# Supplementary material for: Strain-Induced Corrugation and Its Impact on Electronic and Optical Properties of hBN-GaS, -GaSe, and -InS heterostructures
Source: Research Square preprint supplement (doi:10.21203/rs.3.rs-8491186/v1), 2026-01-12
Supplement: Supplementary file 1 [file 36a7deac0a3981d140c31704.pdf]

Strain-Induced Corrugation and Its Impact on  
Electronic and Optical Properties of hBN-GaS,  
-GaSe, and -InS heterostructures  
Supplementary Material

Andrijana Šolajić<sup>1\*</sup> and Jelena Pešić<sup>1</sup>

<sup>1\*</sup>Center for Solid State Physics and New Materials, Institute of Physics  
Belgrade, University of Belgrade, Pregrevica 118, Belgrade, 11080,  
Serbia.

\*Corresponding author(s). E-mail(s): [solajic@ipb.ac.rs](mailto:solajic@ipb.ac.rs);

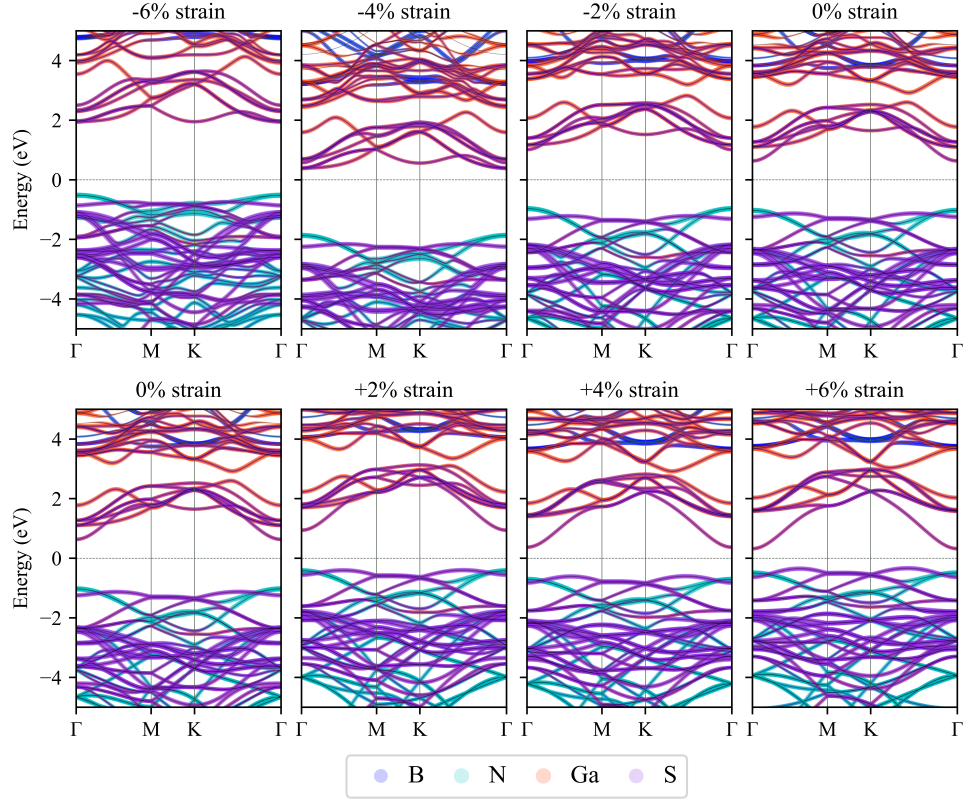

**Fig. 1** Projected band structure of hBN/GaS for strain values in range from -6%, to +6%. The line width is proportional to the contribution of different atoms/states.

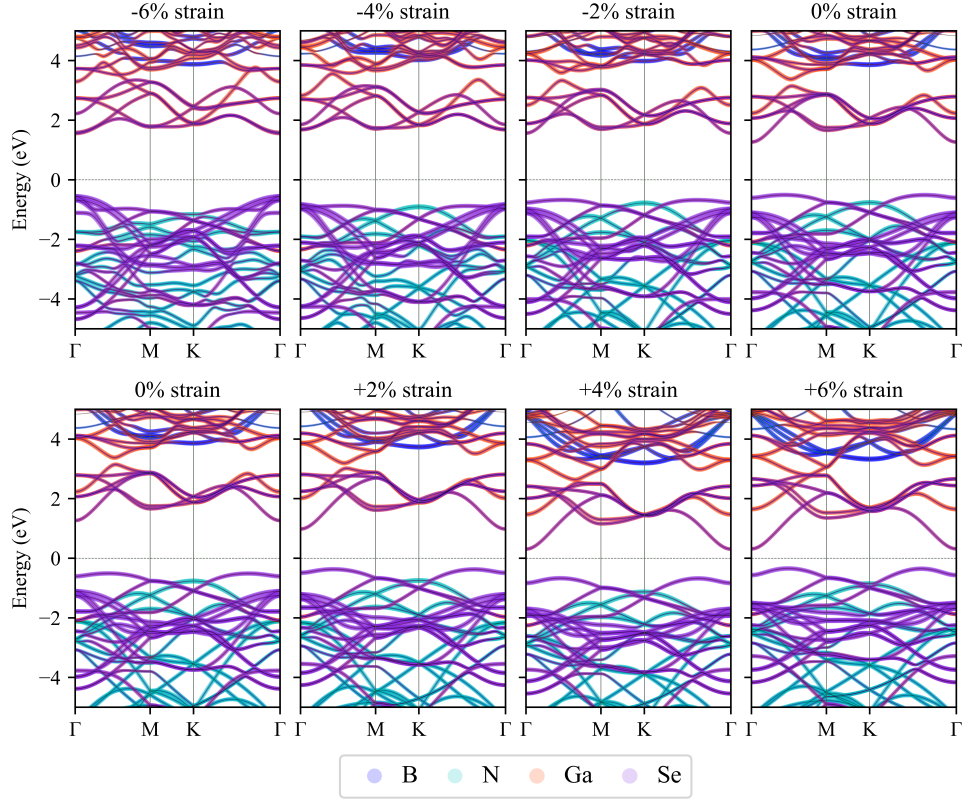

**Fig. 2** Projected band structure of hBN/GaSe for strain values in range from -6%, to +6%. The line width is proportional to the contribution of different atoms/states.

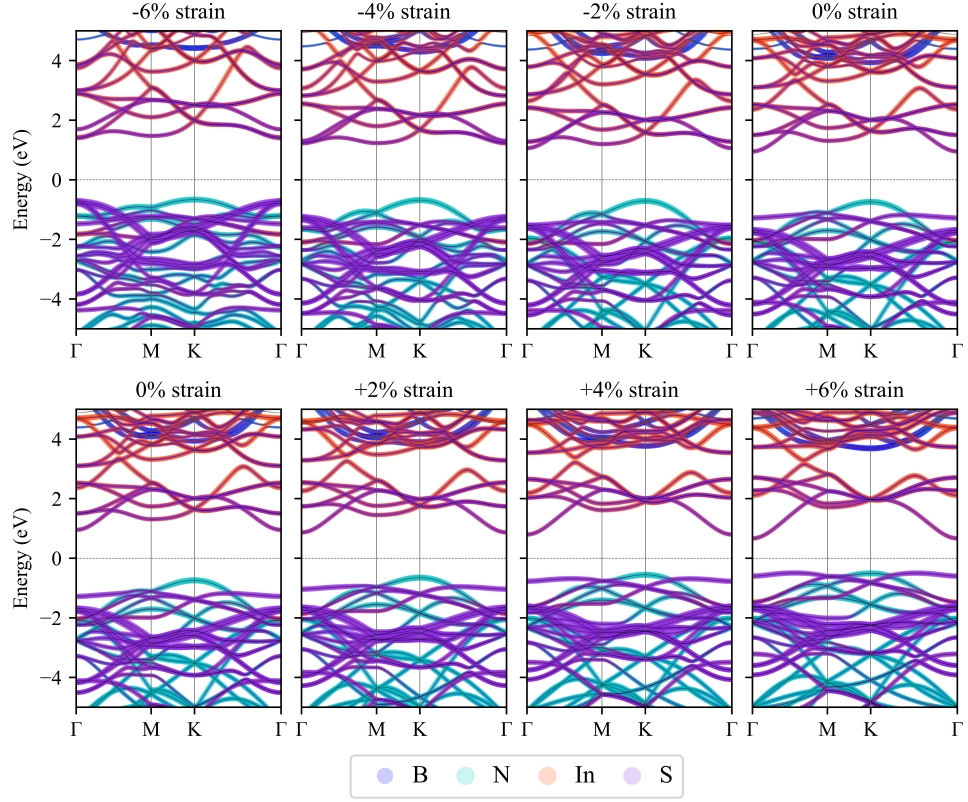

**Fig. 3** Projected band structure of hBN/InS for strain values in range from -6%, to +6%. The line width is proportional to the contribution of different atoms/states.

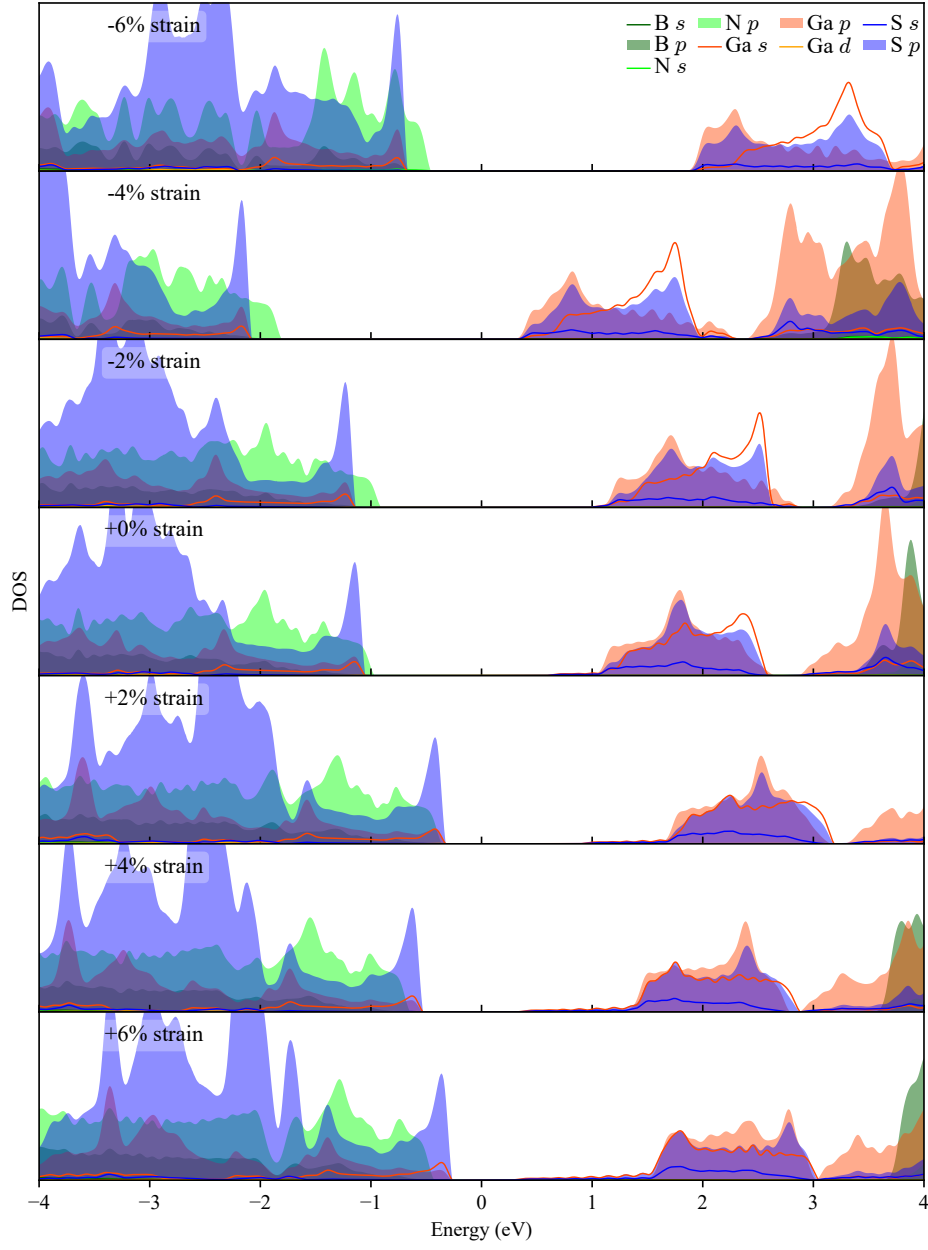

**Fig. 4** Projected density of states (PDOS) of hBN/GaS HSs calculated for applied strain values in range from -6%, to +6%. Contribution from different atoms and states are represented as shown in legend.

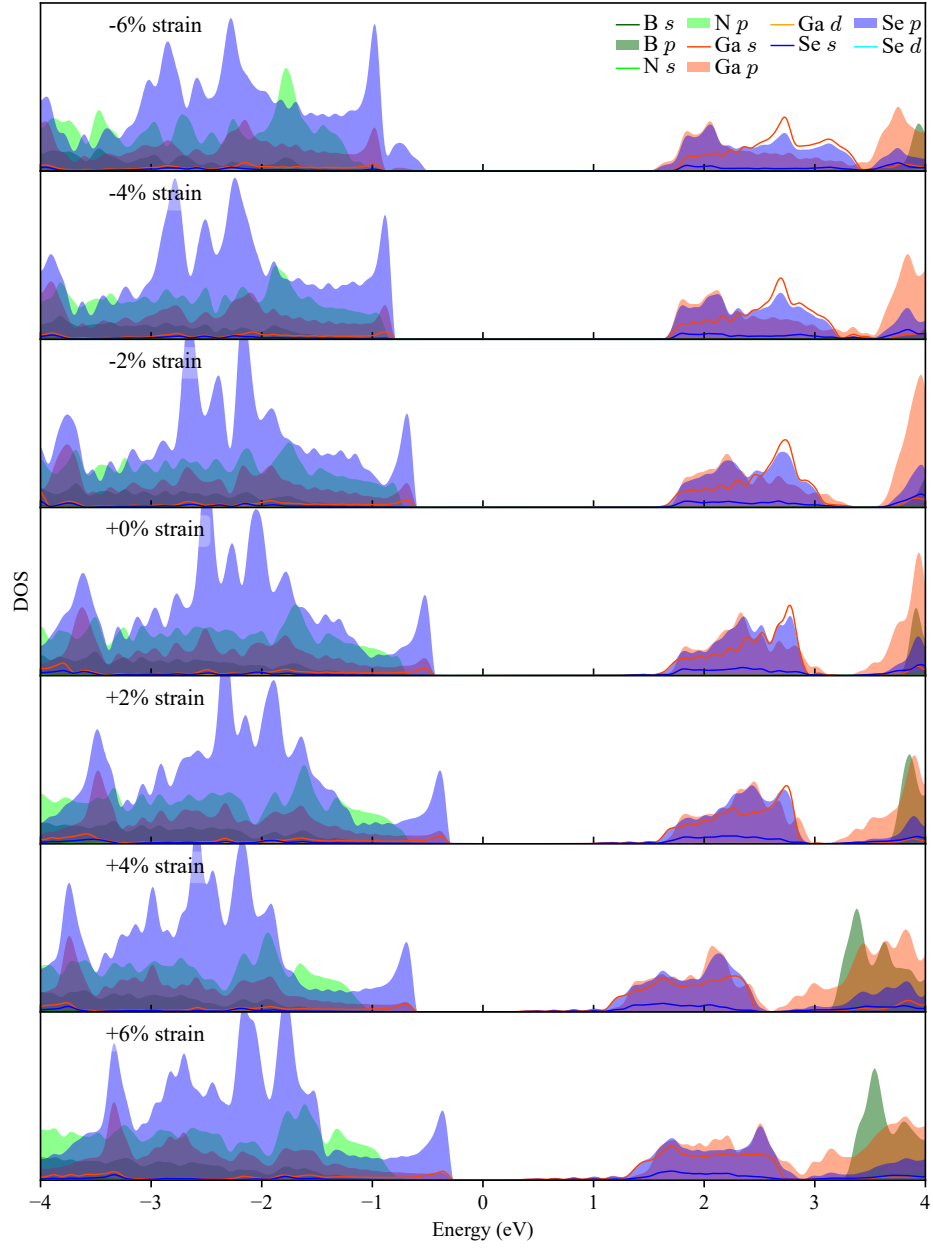

**Fig. 5** Projected density of states (PDOS) of hBN/GaSe HSs calculated for applied strain values in range from -6%, to +6%. Contribution from different atoms and states are represented as shown in legend.

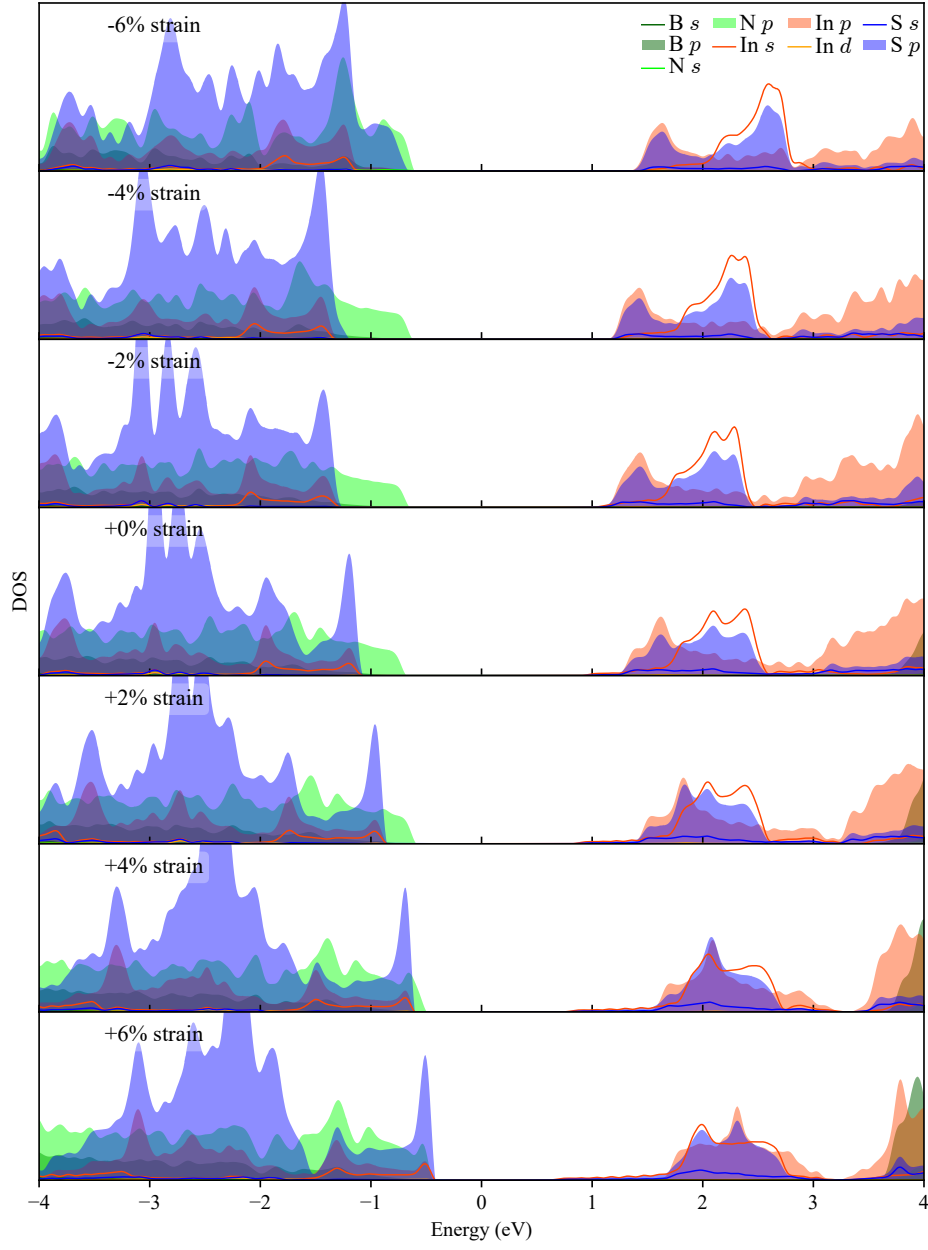

**Fig. 6** Projected density of states (PDOS) of hBN/InS HSs calculated for applied strain values in range from -6%, to +6%. Contribution from different atoms and states are represented as shown in legend.
